# Supplementary material for: Effects of Gasoline and Hydrogen Blends on Exhaust Gas Emissions and Fuel Consumption from Gasoline Internal Combustion Engines
Source: Hindawi journal article supplement (doi:10.1155/2022/5526205), 2022-09-14
Supplement: f1 [file 5526205.f1.docx]

**APPENDICES**

**Appendix A: Properties of Hydrogen and other fuels**

Tables A.1 Hydrogen properties compared with compressed natural gas (CNG), gasoline and diesel [19]


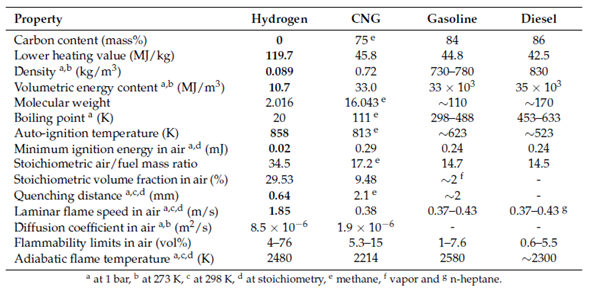


Tables A.2 Flammability and ignition characteristics [4]


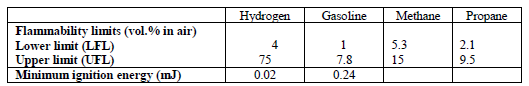


Tables A.3 lean flammability limits of various fuels [4]


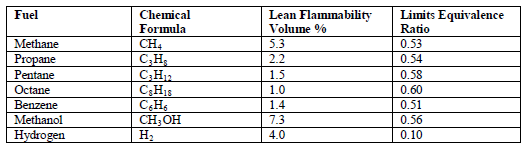


Tables A.4 Auto ignition temperature [4]


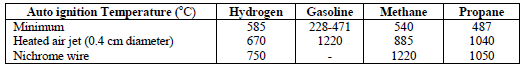


Tables A.5 CO2 [kg/(Q)] as a combustion product of various fuels. Q = heat value of 1 litre of gasoline. [4].


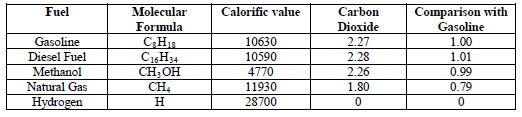


Tables A.6 Comparison of fuel storage weight corresponding to 30 litres of gasoline [4]


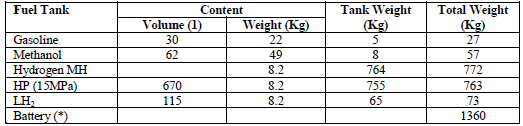


Table A.7 Comparative table of the main indicators of gasoline and hydrogen engines [17].


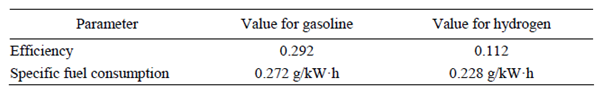


Table A.8 Comparative characteristics of pollutant emissions in the production of various types of fuel [17]


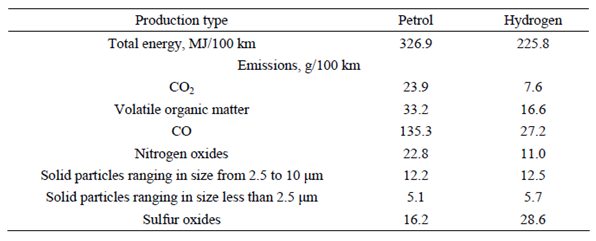


**Appendix B: Emission exposure**

Table B.1 Overview of some technical and environmental characteristics of the assessed vehicles. Fuel consumption and CO2 emission measured on NEDC and EPA-75 test cycle [27].


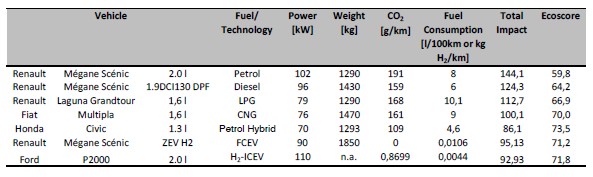


Table B.2 Occupational exposure limits for chemical substances [42].


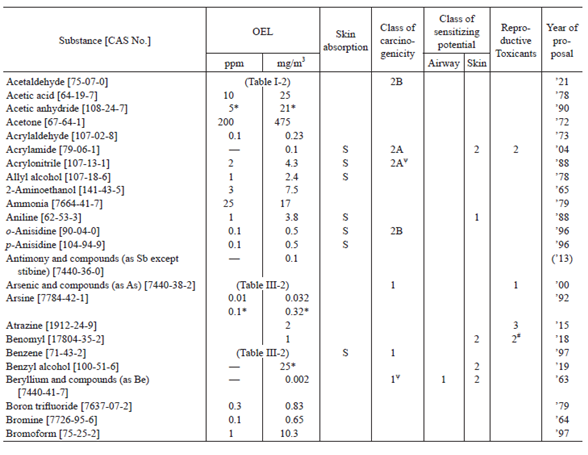


Continuation of Table B.2 Occupational exposure limits for chemical substances [42].


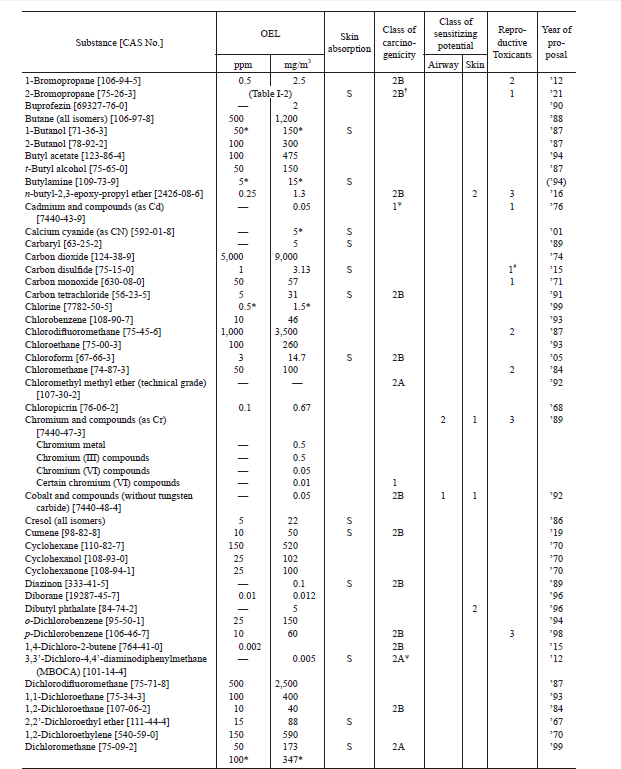


Continuation of Table B.2 Occupational exposure limits for chemical substances [42].


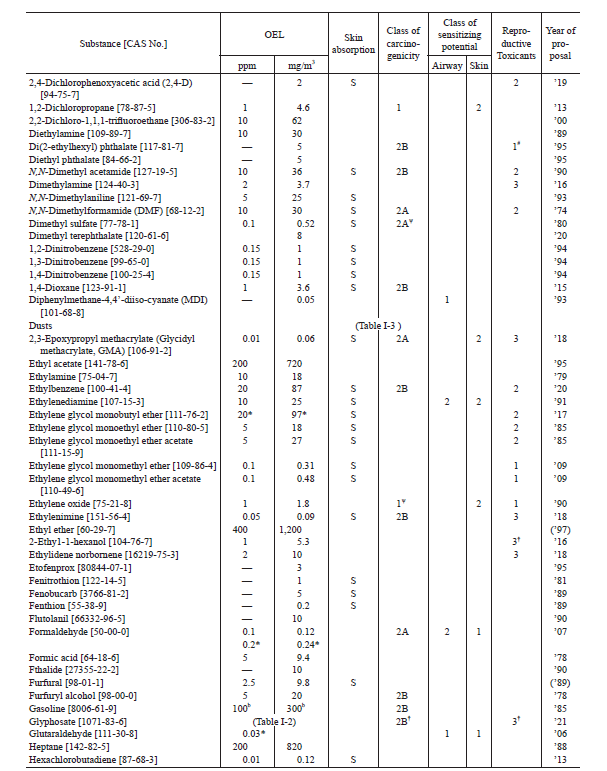


Continuation of Table B.2 Occupational exposure limits for chemical substances [42].


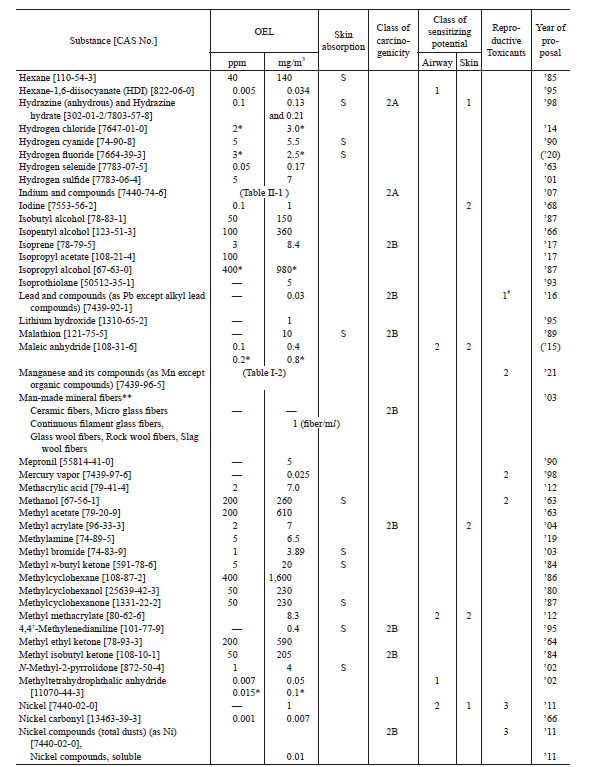


Continuation of Table B.2 Occupational exposure limits for chemical substances [42].


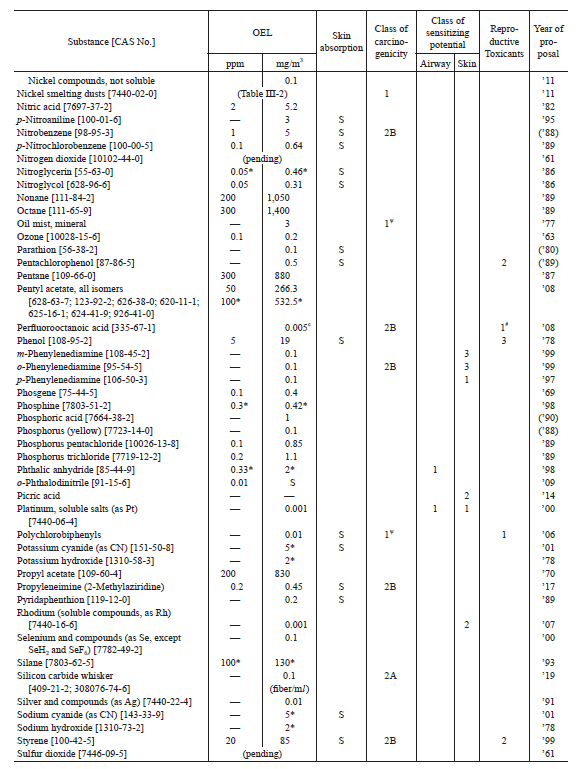


Continuation of Table B.2 Occupational exposure limits for chemical substances [42].


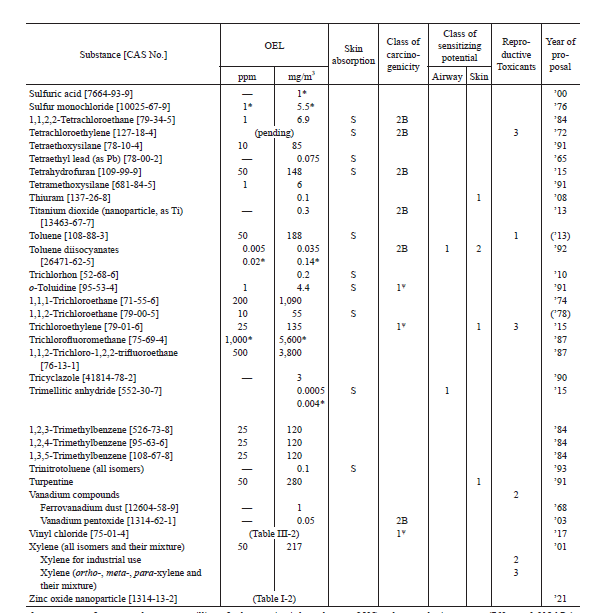


Table B.3 Exposure limits for gaseous pollutants from diesel engines [43].


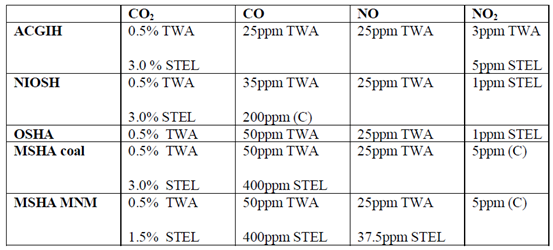


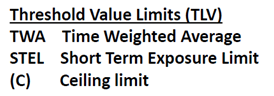


Table B.4 Range of operability


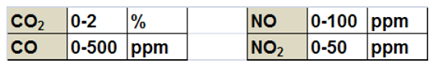


Table B.5 Experimental values of LELs [38]


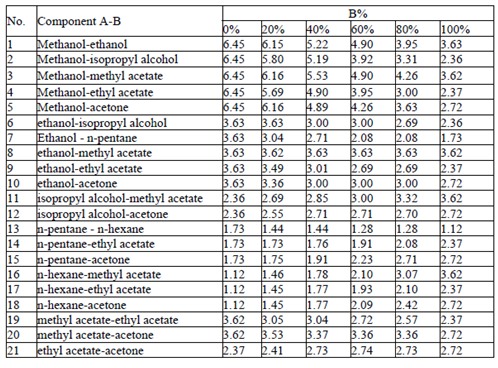


Table B.6 Comparisons between the experimental and database values of LELs for pure chemicals


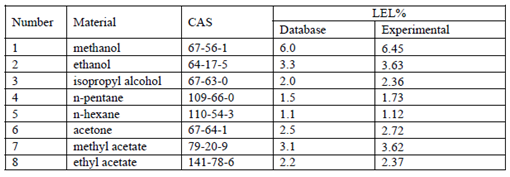


**Appendix C: Photos and tables of main equipment used**

Photo C.1 Test bench


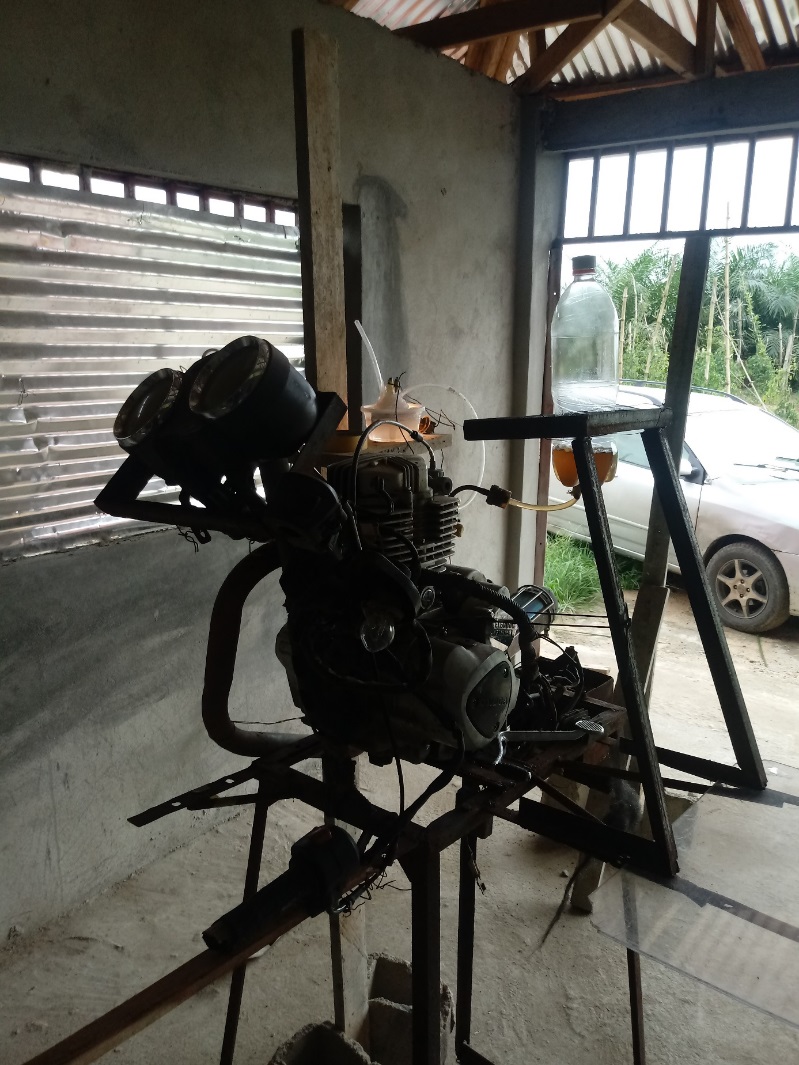


Photo C.2 Multi gas detector


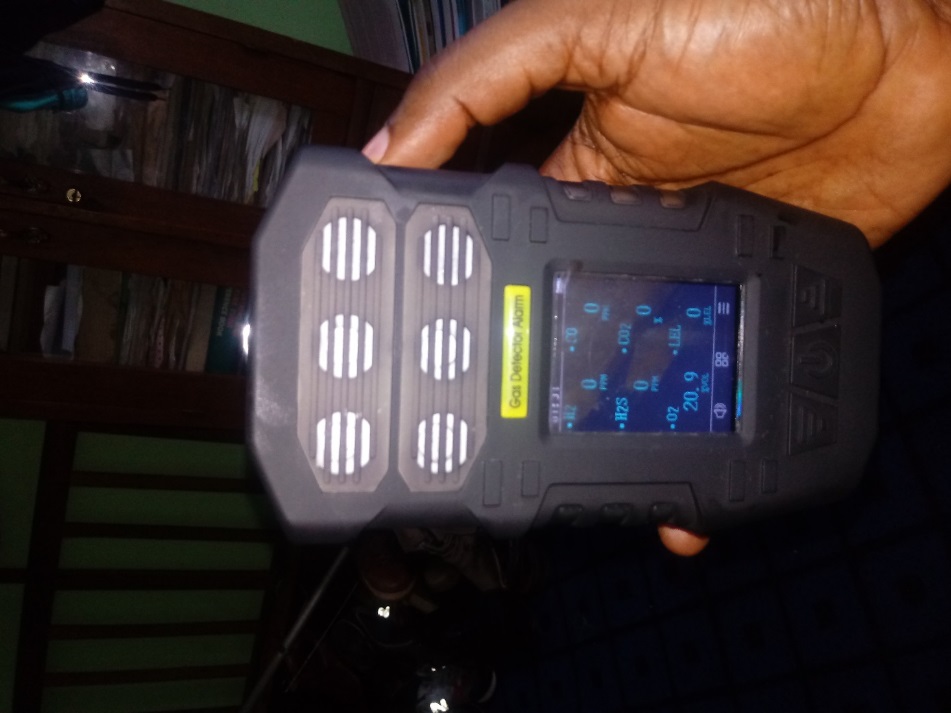


Photo C.3 Hydrogen gas detector


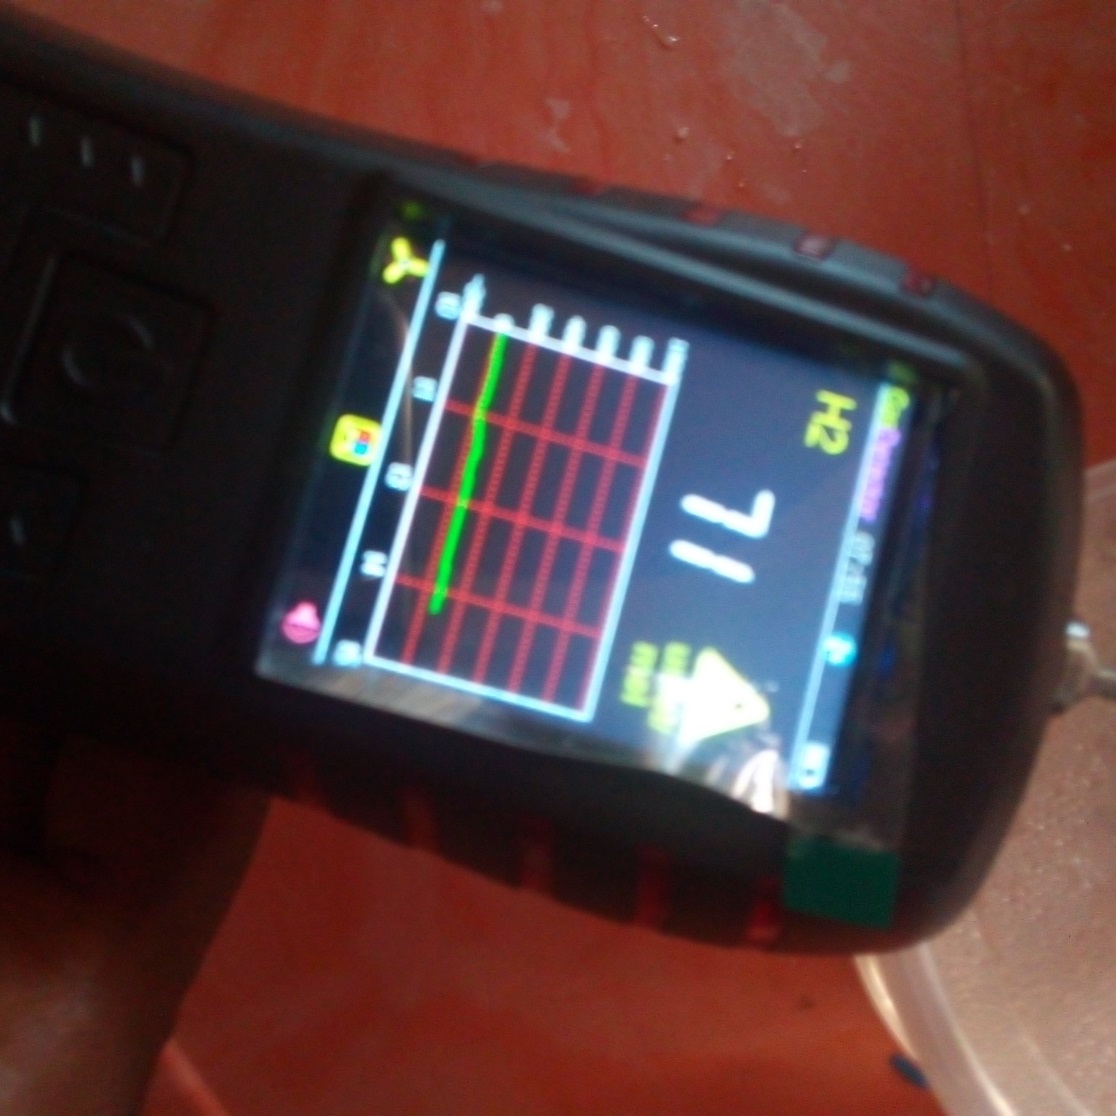


Table C1. Specifications of the gas detector

Table C2. Specifications of the infra-red thermometer

Table C3. Characteristics of the flow rate meter

**Appendix D: Averaged experimental data**

|  | | | Baseline experiment | | | | | | | | | | | | | | |  |
| --- | --- | --- | --- | --- | --- | --- | --- | --- | --- | --- | --- | --- | --- | --- | --- | --- | --- | --- |
| Temperature | | | 70 | 73 | 76 | 79 | 82 | 85 | 88 | 91 | 94 | 97 | 100 | 103 | 106 | 109 | 112 |  |
| CO |  |  | 592 | 592 | 592 | 592 | 592 | 592 | 592 | 592 | 592 | 592 | 592 | 592 | 592 | 592 |  |  |
| H2S |  |  | 4 | 4 | 5 | 3 | 4 | 1 | 4 | 2 | 3 | 3 | 2 | 4 | 2 | 3 | 0 |  |
| LEL |  |  | 7 | 9 | 8 | 9 | 8 | 8 | 11 | 10 | 12 | 12 | 10 | 12 | 11 | 8 | 8 |  |
|  |  |  |  |  |  |  |  |  |  |  |  |  |  |  |  |  |  |  |
| Temperature | | | 70 | 73 | 76 | 79 | 82 | 85 | 88 | 91 | 94 | 97 | 100 | 103 | 106 | 109 | 112 |  |
| CO |  |  | 592 | 592 | 592 | 592 | 592 | 592 | 592 | 592 | 592 | 592 | 592 | 592 | 592 | 592 | 592 |  |
| H2S |  |  | 7 | 4 | 4 | 3 | 1 | 1 | 0 | 0 | 1 | 2 | 2 | 1 | 1 | 0 | 1 |  |
| LEL |  |  | 5 | 5 | 5 | 5 | 5 | 5 | 5 | 5 | 5 | 5 | 5 | 5 | 5 | 5 | 5 |  |
|  |  |  |  |  |  |  |  |  |  |  |  |  |  |  |  |  |  |  |
| Temperature | | | 70 | 73 | 76 | 79 | 82 | 85 | 88 | 91 | 94 | 97 | 100 | 103 | 106 | 109 | 112 |  |
| CO |  |  | 591 | 591 | 591 | 592 | 592 | 591 | 591 | 591 | 591 | 592 | 591 | 591 | 592 | 592 | 592 |  |
| H2S |  |  | 10 | 7 | 4 | 4 | 3 | 2 | 1 | 3 | 2 | 2 | 3 | 0 | 2 | 2 | 0 |  |
| LEL |  |  | 6 | 5 | 5 | 5 | 5 | 5 | 5 | 5 | 5 | 5 | 5 | 5 | 5 | 5 | 5 |  |
|  |  |  |  |  |  |  |  |  |  |  |  |  |  |  |  |  |  |  |
|  |  |  |  |  |  |  | average values | | | |  |  |  |  |  |  |  |  |
| Temperature | | | 70 | 73 | 76 | 79 | 82 | 85 | 88 | 91 | 94 | 97 | 100 | 103 | 106 | 109 | 112 |  |
| CO |  |  | 592 | 592 | 592 | 592 | 592 | 592 | 592 | 592 | 592 | 592 | 592 | 592 | 592 | 592 | 592 |  |
| H2S |  |  | 7 | 5 | 4 | 3 | 3 | 1 | 2 | 2 | 2 | 2 | 2 | 2 | 2 | 2 | 1 |  |
| LEL |  |  | 6 | 6 | 6 | 6 | 6 | 6 | 7 | 7 | 7 | 7 | 7 | 7 | 7 | 6 | 6 |  |
|  |  |  |  |  |  |  |  |  |  |  |  |  |  |  |  |  |  |  |
|  |  |  |  |  |  |  |  |  |  |  |  |  |  |  |  |  |  |  |
| Temperature | | | 70 | 73 | 76 | 79 | 82 | 85 | 88 | 91 | 94 | 97 | 100 | 103 | 106 | 109 | 112 |  |
| LEL |  |  | 6 | 6 | 6 | 6 | 6 | 6 | 7 | 7 | 7 | 7 | 7 | 7 | 7 | 6 | 6 |  |
|  |  |  |  |  |  |  |  |  |  |  |  |  |  |  |  |  |  |  |
|  |  |  |  |  |  |  |  |  |  |  |  |  |  |  |  |  |  |  |
|  |  |  |  |  |  | DATA FOR 1m distance from exhaust tail pipe to gas detector 3000 REV/MIN, Gasoline only | | | | | | | | |  |  |  |  |
|  |  |  |  |  |  |  |  |  |  |  |  |  |  |  |  |  |  |  |
|  |  | **TEST No 1** | |  |  |  |  |  |  |  |  |  |  |  |  |  |  |  |
|  |  | Infra thermo temp: | | 70 | 73 | 76 | 79 | 82 | 85 | 88 | 91 | 94 | 97 | 100 | 103 | 106 | 109 | 112 |
|  |  | CO |  | 457 | 424 | 502 | 431 | 426 | 377 | 367 | 233 | 364 | 364 | 390 | 332 | 319 | 252 | 278 |
|  |  | H2S |  | 2 | 1 | 2 | 1 | 1 | 0 | 1 | 0 | 1 | 1 | 2 | 0 | 0 | 0 | 1 |
|  |  | LEL |  | 4 | 3 | 3 | 3 | 4 | 2 | 3 | 1 | 3 | 2 | 3 | 2 | 2 | 1 | 3 |
|  |  |  |  |  |  |  |  |  |  |  |  |  |  |  |  |  |  |  |
|  |  | **TEST No 2** | |  |  |  |  |  |  |  |  |  |  |  |  |  |  |  |
|  |  | Infra thermo temp: | | 70 | 73 | 76 | 79 | 82 | 85 | 88 | 91 | 94 | 97 | 100 | 103 | 106 | 109 | 112 |
|  |  | CO |  | 423 | 400 | 378 | 397 | 373 | 444 | 427 | 385 | 360 | 420 | 254 | 302 | 302 | 365 | 369 |
|  |  | H2S |  | 2 | 2 | 0 | 1 | 1 | 2 | 1 | 1 | 1 | 1 | 0 | 1 | 0 | 2 | 2 |
|  |  | LEL |  | 3 | 3 | 3 | 3 | 3 | 4 | 3 | 3 | 3 | 2 | 2 | 3 | 2 | 3 | 3 |
|  |  |  |  |  |  |  |  |  |  |  |  |  |  |  |  |  |  |  |
|  |  | **TEST No 3** | |  |  |  |  |  |  |  |  |  |  |  |  |  |  |  |
|  |  | Infra thermo temp: | | 70 | 73 | 76 | 79 | 82 | 85 | 88 | 91 | 94 | 97 | 100 | 103 | 106 | 109 | 112 |
|  |  | CO |  | 374 | 320 | 228 | 250 | 270 | 222 | 265 | 346 | 306 | 254 | 310 | 300 | 281 | 339 | 252 |
|  |  | H2S |  | 2 | 0 | 0 | 1 | 0 | 1 | 0 | 2 | 1 | 0 | 2 | 1 | 1 | 2 | 0 |
|  |  | LEL |  | 3 | 2 | 1 | 3 | 2 | 3 | 3 | 2 | 3 | 1 | 3 | 3 | 4 | 2 | 1 |
|  |  |  |  |  |  |  |  |  |  |  |  |  |  |  |  |  |  |  |
|  |  |  |  |  |  |  |  | AVERAGES | |  |  |  |  |  |  |  |  |  |
|  |  | Infra thermo temp: | | 70 | 73 | 76 | 79 | 82 | 85 | 88 | 91 | 94 | 97 | 100 | 103 | 106 | 109 | 112 |
|  |  | CO |  | 374 | 320 | 228 | 250 | 270 | 222 | 265 | 346 | 306 | 254 | 310 | 300 | 281 | 339 | 252 |
|  |  | H2S |  | 2 | 0 | 0 | 1 | 0 | 1 | 0 | 2 | 1 | 0 | 2 | 1 | 1 | 2 | 0 |
|  |  | LEL |  | 3 | 2 | 1 | 3 | 2 | 3 | 3 | 2 | 3 | 1 | 3 | 3 | 4 | 2 | 1 |
|  |  |  |  |  |  |  |  |  |  |  |  |  |  |  |  |  |  |  |
| Engine Temperature | | 70 | 73 | 76 | 79 | 82 | 85 | 88 | 91 | 94 | 97 | 100 | 103 | 106 | 109 | 112 |  |  |
| 0.5 m dist. Gasoline | | 592 | 592 | 592 | 592 | 592 | 592 | 592 | 592 | 592 | 592 | 592 | 592 | 592 | 592 | 592 |  |  |
| 1 m dist. Gasoline | | 374 | 320 | 228 | 250 | 270 | 222 | 265 | 346 | 306 | 254 | 310 | 300 | 281 | 339 | 252 |  |  |
| 1 m dist. Gasoline +H2 | | 279 | 246 | 256 | 250 | 223 | 236 | 278 | 171 | 311 | 206 | 245 | 223 | 222 | 219 | 210 |  |  |
| Engine Temperature | | 70 | 73 | 76 | 79 | 82 | 85 | 88 | 91 | 94 | 97 | 100 | 103 | 106 | 109 | 112 |  |  |
| 0,5 m dist. Gasoline | | 7 | 5 | 4 | 3 | 3 | 1 | 2 | 2 | 2 | 2 | 2 | 2 | 2 | 2 | 1 |  |  |
| 1 m dist. Gasoline | | 2 | 0 | 0 | 1 | 0 | 1 | 0 | 2 | 1 | 0 | 2 | 1 | 1 | 2 | 0 |  |  |
| 1 m dist. Gasoline+ H2 | | 2 | 1 | 1 | 0 | 0 | 0 | 1 | 0 | 1 | 0 | 1 | 0 | 0 | 0 | 0 |  |  |
| Engine Temperature | | 70 | 73 | 76 | 79 | 82 | 85 | 88 | 91 | 94 | 97 | 100 | 103 | 106 | 109 | 112 |  |  |
| 0,5 m dist. Gasoline | | 6 | 6 | 6 | 6 | 6 | 6 | 7 | 7 | 7 | 7 | 7 | 7 | 7 | 6 | 6 |  |  |
| 1 m dist. Gasoline | | 3 | 2 | 1 | 3 | 2 | 3 | 3 | 2 | 3 | 1 | 3 | 3 | 4 | 2 | 1 |  |  |
| 1 m dist. Gasoline +H2 | | 3 | 3 | 2 | 3 | 1 | 2 | 3 | 3 | 2 | 1 | 2 | 2 | 1 | 1 | 1 |  |  |
|  |  |  |  |  |  |  |  |  |  |  |  |  |  |  |  |  |  |  |
|  |  |  |  |  |  |  |  |  |  |  |  |  |  |  |  |  |  |  |
|  |  |  | DATA FOR 1m distance from exhaus tail pipe to gas detector 2000 REV/MIN, H2 + gasoline/ flowrate (1098 ml/m - 6773ml) | | | | | | | | | | | | |  |  |  |
| Electronic thermo temp: | | |  |  |  |  |  |  |  |  |  |  |  |  |  |  |  |  |
| CO |  |  | 81 | 113 | 74 | 67 | 57 | 46 | 60 | 82 | 141 | 61 | 51 | 32 | 86 | 78 | 131 | 62 |
| H2S |  |  | 2 | 1 | 0 | 0 | 0 | 0 | 0 | 0 | 1 | 0 | 0 | 0 | 0 | 0 | 1 | 0 |
| LEL |  |  | 1 | 1 | 1 | 1 | 1 | 1 | 1 | 1 | 1 | 1 | 1 | 1 | 1 | 1 | 1 | 1 |
|  |  |  |  |  |  |  |  |  |  |  |  |  |  |  |  |  |  |  |
| Electronic thermo temp: | | |  |  |  |  |  |  |  |  |  |  |  |  |  |  |  |  |
| CO |  |  | 142 | 109 | 106 | 175 | 155 | 161 | 111 | 108 | 64 | 99 | 95 | 110 | 118 | 100 | 100 | 125 |
| H2S |  |  | 2 | 1 | 1 | 1 | 0 | 0 | 0 | 0 | 0 | 0 | 0 | 0 | 0 | 0 | 0 | 1 |
| LEL |  |  | 1 | 1 | 1 | 2 | 1 | 1 | 2 | 1 | 1 | 1 | 1 | 1 | 1 | 1 | 1 | 1 |
|  |  |  |  |  |  |  |  |  |  |  |  |  |  |  |  |  |  |  |
|  |  |  |  |  |  |  |  |  | Averages 2000 rev/min | | |  |  |  |  |  |  |  |
| Engine Temperature | | | 70 | 73 | 76 | 79 | 82 | 85 | 88 | 91 | 94 | 97 | 100 | 103 | 106 | 109 | 112 |  |
| CO |  |  | 112 | 111 | 90 | 121 | 106 | 104 | 86 | 95 | 103 | 80 | 73 | 71 | 102 | 89 | 116 |  |
| H2S |  |  | 2 | 1 | 1 | 1 | 0 | 0 | 0 | 0 | 0 | 0 | 0 | 0 | 0 | 0 | 0 |  |
| LEL |  |  | 1 | 1 | 1 | 2 | 1 | 1 | 2 | 1 | 1 | 1 | 1 | 1 | 1 | 1 | 1 |  |
|  |  |  |  |  |  |  |  |  |  |  |  |  |  |  |  |  |  |  |
|  |  |  |  |  |  |  |  |  |  |  |  |  |  |  |  |  |  |  |
|  |  |  | DATA FOR 1m distance from exhaus tail pipe to gas detector 1000 REV/MIN, H2 + gasoline /flowrate (874 ml/m - 21458ml) | | | | | | | | | | | |  |  |  |  |
| CO |  |  | 18 | 77 | 54 | 26 | 79 | 94 | 92 | 86 | 33 | 86 | 101 | 67 | 131 | 42 | 33 | 40 |
| H2S |  |  | 0 | 0 | 0 | 0 | 1 | 1 | 0 | 0 | 0 | 0 | 0 | 0 | 0 | 0 | 0 | 0 |
| LEL |  |  | 1 | 1 | 1 | 1 | 1 | 1 | 1 | 1 | 1 | 1 | 1 | 1 | 1 | 1 | 1 | 1 |
|  |  |  |  |  |  |  |  |  |  |  |  |  |  |  |  |  |  |  |
| **TEST No 2** | |  |  |  |  |  |  |  |  |  |  |  |  |  |  |  |  |  |
| CO |  |  | 67 | 314 | 228 | 127 | 112 | 94 | 266 | 318 | 200 | 269 | 62 | 251 | 214 | 221 | 244 | 243 |
| H2S |  |  | 1 | 4 | 2 | 0 | 0 | 0 | 2 | 3 | 0 | 1 | 0 | 2 | 0 | 0 | 0 | 1 |
| LEL |  |  | 2 | 3 | 2 | 3 | 3 | 1 | 2 | 3 | 2 | 2 | 1 | 2 | 1 | 1 | 1 | 2 |
|  |  |  |  |  |  |  |  |  |  |  |  |  |  |  |  |  |  |  |
|  |  |  |  |  |  |  |  |  | Averages 1000 rev/min | | |  |  |  |  |  |  |  |
| Electronic thermo temp: | | | 70 | 73 | 76 | 79 | 82 | 85 | 88 | 91 | 94 | 97 | 100 | 103 | 106 | 109 | 112 |  |
| CO |  |  | 43 | 196 | 141 | 77 | 96 | 94 | 179 | 202 | 117 | 178 | 82 | 159 | 173 | 132 | 139 |  |
| H2S |  |  | 1 | 2 | 1 | 0 | 1 | 1 | 1 | 2 | 0 | 1 | 0 | 1 | 0 | 0 | 0 |  |
| LEL |  |  | 2 | 2 | 2 | 2 | 2 | 1 | 2 | 2 | 2 | 2 | 1 | 2 | 1 | 1 | 1 |  |
|  |  |  |  |  |  |  |  |  |  |  |  |  |  |  |  |  |  |  |
|  |  |  |  |  |  |  |  |  |  |  |  |  |  |  |  |  |  |  |
|  |  |  | DATA FOR 1m distance from exhaus tail pipe to gas detector 4000 REV/MIN, H2 + gasoline/ flowrate (1098 ml/m - 2393,6ml) | | | | | | | | | | | | |  |  |  |
|  |  |  |  |  |  |  |  |  |  |  |  |  |  |  |  |  |  |  |
| Engine Temperature | | | 70 | 73 | 76 | 79 | 82 | 85 | 88 | 91 | 94 | 97 | 100 | 103 | 106 | 109 | 112 |  |
| CO |  |  | 279 | 246 | 256 | 250 | 223 | 236 | 278 | 191 | 264 | 308 | 278 | 281 | 274 | 263 | 237 |  |
| H2S |  |  | 2 | 1 | 1 | 0 | 0 | 0 | 1 | 2 | 3 | 2 | 1 | 1 | 1 | 1 | 0 |  |
| LEL |  |  | 3 | 3 | 2 | 3 | 1 | 2 | 3 | 2 | 3 | 2 | 2 | 3 | 2 | 3 | 2 |  |
|  |  |  |  |  |  |  |  |  |  |  |  |  |  |  |  |  |  |  |
|  |  |  | DATA FOR 1m distance from exhaus tail pipe to gas detector 3000 REV/MIN, H2 + gasoline | | | | | | | | |  |  |  |  |  |  |  |
| CO Gasoline +H2 at 3000 rev/min | | 279 | 246 | 256 | 250 | 223 | 236 | 278 | 171 | 311 | 206 | 245 | 223 | 222 | 219 | 210 |  |  |
| H2S Gasoline+ H2 at 3000 rev/min | | 2 | 1 | 1 | 0 | 0 | 0 | 1 | 0 | 1 | 0 | 1 | 0 | 0 | 0 | 0 |  |  |
| LEL Gasoline +H2 at 3000 rev/min | | 3 | 3 | 2 | 3 | 1 | 2 | 3 | 3 | 2 | 1 | 2 | 2 | 1 | 1 | 1 |  |  |
|  |  |  |  |  |  |  |  |  |  |  |  |  |  |  |  |  |  |  |
|  |  |  |  |  |  |  |  |  |  |  |  |  |  |  |  |  |  |  |
|  |  |  |  |  |  |  |  |  |  |  |  |  |  |  |  |  |  |  |
|  |  |  |  |  |  |  | CO |  |  |  |  |  |  |  |  |  |  |  |
|  |  |  |  |  |  |  |  |  |  |  |  |  |  |  |  |  |  |  |
| Engine Temperature | | | 70 | 73 | 76 | 79 | 82 | 85 | 88 | 91 | 94 | 97 | 100 | 103 | 106 | 109 | 112 |  |
| 1000 Rev/min | |  | 43 | 196 | 141 | 77 | 96 | 94 | 179 | 202 | 117 | 178 | 82 | 159 | 173 | 132 | 139 |  |
| 2000 Rev/min | |  | 112 | 111 | 90 | 121 | 106 | 104 | 86 | 95 | 103 | 80 | 73 | 71 | 102 | 89 | 116 |  |
| 3000 Rev/min | |  | 279 | 246 | 256 | 250 | 223 | 236 | 278 | 171 | 311 | 206 | 245 | 223 | 222 | 219 | 210 |  |
| 4000 Rev/min | |  | 339 | 314 | 316 | 310 | 253 | 236 | 278 | 191 | 264 | 308 | 278 | 281 | 274 | 263 | 237 |  |
|  |  |  |  |  |  |  |  |  |  |  |  |  |  |  |  |  |  |  |
|  |  |  |  |  |  |  | H2S |  |  |  |  |  |  |  |  |  |  |  |
|  |  |  |  |  |  |  |  |  |  |  |  |  |  |  |  |  |  |  |
| Engine Temperature | | | 70 | 73 | 76 | 79 | 82 | 85 | 88 | 91 | 94 | 97 | 100 | 103 | 106 | 109 | 112 |  |
| 1000 Rev/min | |  | 1 | 2 | 1 | 0 | 1 | 1 | 1 | 2 | 0 | 1 | 0 | 1 | 0 | 0 | 0 |  |
| 2000 Rev/min | |  | 2 | 1 | 1 | 1 | 0 | 0 | 0 | 0 | 0 | 0 | 0 | 0 | 0 | 0 | 0 |  |
| 3000 Rev/min | |  | 2 | 1 | 1 | 0 | 0 | 0 | 1 | 0 | 1 | 0 | 1 | 0 | 0 | 0 | 0 |  |
| 4000 Rev/min | |  | 2 | 1 | 1 | 0 | 0 | 0 | 1 | 2 | 3 | 2 | 1 | 1 | 1 | 1 | 0 |  |
|  |  |  |  |  |  |  |  |  |  |  |  |  |  |  |  |  |  |  |
|  |  |  |  |  |  |  |  |  |  |  |  |  |  |  |  |  |  |  |
|  |  |  |  |  |  |  | LEL |  |  |  |  |  |  |  |  |  |  |  |
|  |  |  |  |  |  |  |  |  |  |  |  |  |  |  |  |  |  |  |
| Engine Temperature | | | 70 | 73 | 76 | 79 | 82 | 85 | 88 | 91 | 94 | 97 | 100 | 103 | 106 | 109 | 112 |  |
| 1000 Rev/min | |  | 2 | 2 | 2 | 2 | 2 | 1 | 2 | 2 | 2 | 2 | 1 | 2 | 1 | 1 | 1 |  |
| 2000 Rev/min | |  | 1 | 1 | 1 | 2 | 1 | 1 | 2 | 1 | 1 | 1 | 1 | 1 | 1 | 1 | 1 |  |
| 3000 Rev/min | |  | 3 | 3 | 2 | 3 | 1 | 2 | 3 | 3 | 2 | 1 | 2 | 2 | 1 | 1 | 1 |  |
| 4000 Rev/min | |  | 3 | 3 | 2 | 3 | 1 | 2 | 3 | 2 | 3 | 2 | 2 | 3 | 2 | 3 | 2 |  |
|  |  |  |  |  |  |  |  |  |  |  |  |  |  |  |  |  |  |  |
